# Supplementary material
Source: publisher figshare collection journal article supplement (https://tandf.figshare.com/ndownloader/files/20150831)
Supplement: Supplementary file 1 [file 20150831]

A Combined X-ray Crystallography and Theoretical Study of PPh2CH2SPh and PPh2C6H4SMe Ligands

**Siti Syaida Sirata*, Hafiz Malik Hussien Abdelnasirb, Omar bin Shawkatalyc**

a School of Chemistry and Environment, Faculty of Applied Sciences, Universiti Teknologi MARA, Negeri Sembilan Branch, Kuala Pilah Campus, 72000 Kuala Pilah, Negeri Sembilan, Malaysia.

bDepartment of Chemistry, Alzaiem Alazhari University, 1933, Khartoum, Sudan.

cChemical Sciences Programme, School of Distance Education, Universiti Sains Malaysia, 11800 USM, Penang, Malaysia.

Email: sitisyaida@uitm.edu.my

**Supplemental Materials**


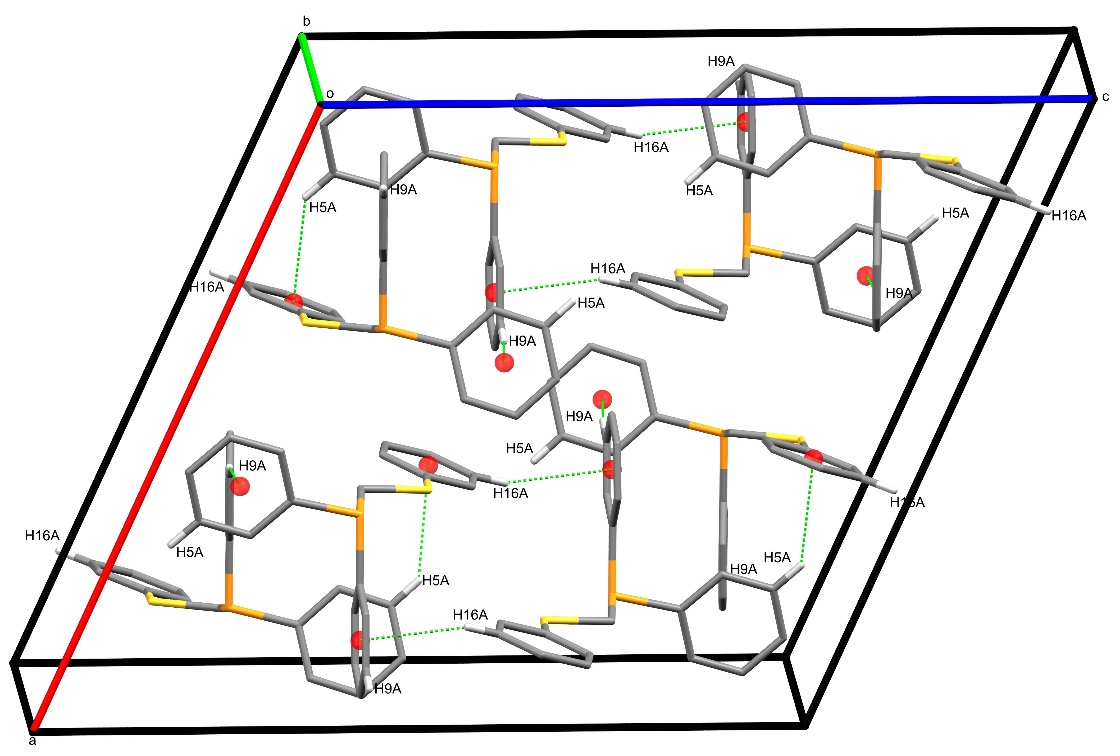


**Figure S 1:** Crystal packing of **1**: C16–H16A···Cg(2) in the *c*-direction and the interaction with C9–H5A···Cg(3) shows 2D sheet in *ac*-plane.


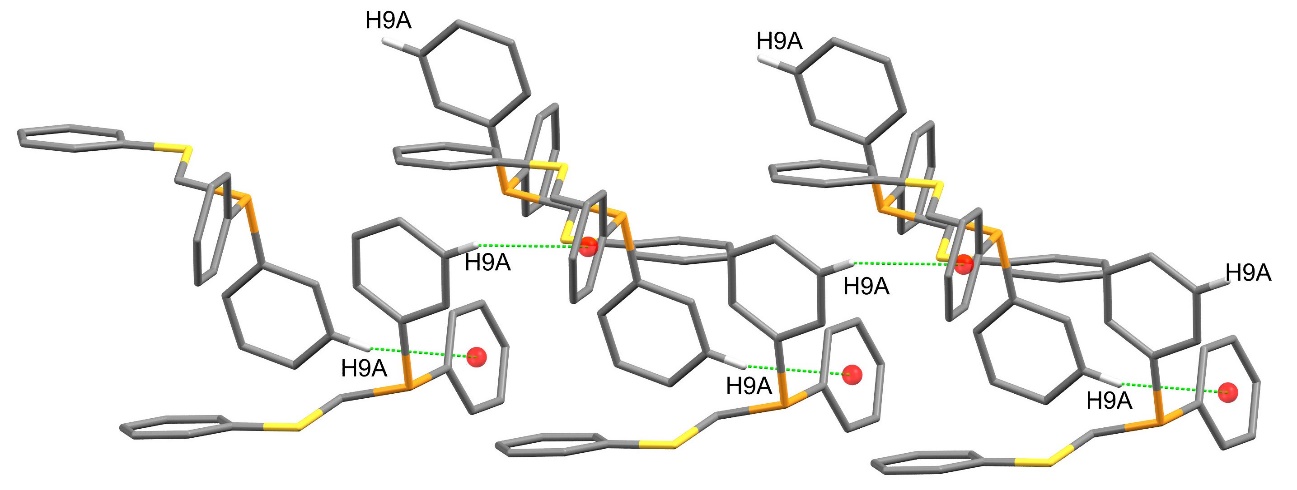


**Figure S 2:** Crystal packing of 1: C9–H9A···Cg(1) in the *b*-direction.

**Table S 1:** C–H···π interaction geometries for **1** and **2**.

| Structure | C–H···Cg (Å) | C–H (Å) | H···Cg (Å) | C···Cg (Å) | C–H···Cg (°) |
| --- | --- | --- | --- | --- | --- |
| **1** | C5–H5A···Cg(3) | 0.95 | 2.96 | 3.7125(17) | 137 |
|  | C16–H16A···Cg(2) | 0.95 | 2.78 | 3.6245(16) | 149 |
|  | C9–H9A···Cg(1) | 0.95 | 2.95 | 3.8464(15) | 158 |
| **2** | C4–H4A···Cg(2) | 0.95 | 2.80 | 3.6428(13) | 148 |
|  | C11–H11A···Cg(1) | 0.95 | 2.68 | 3.5880(14) | 160 |


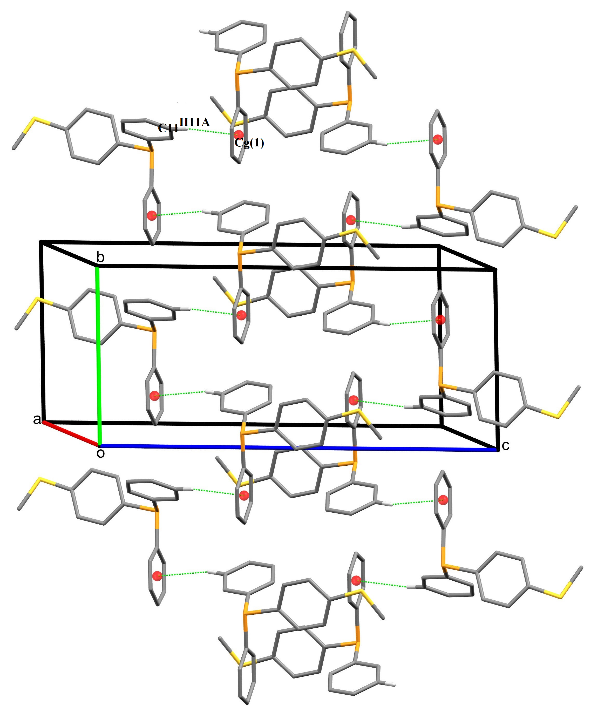

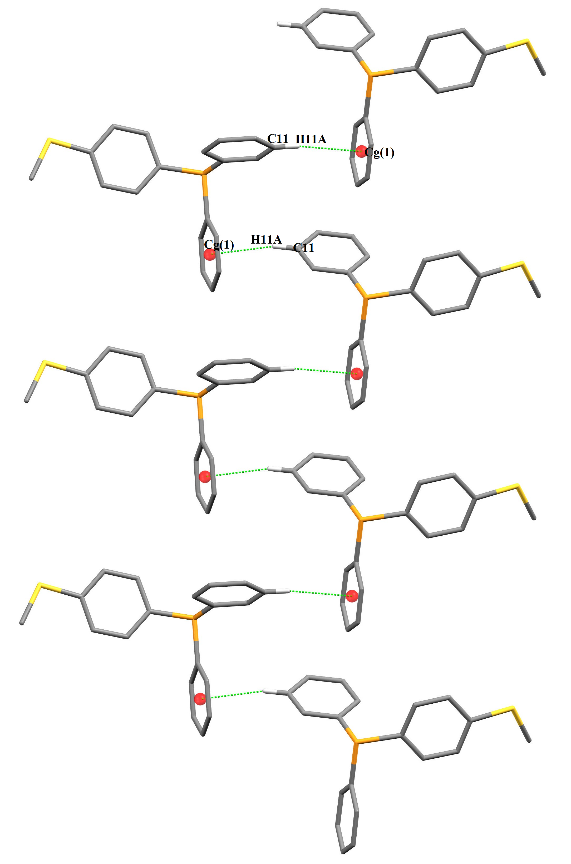

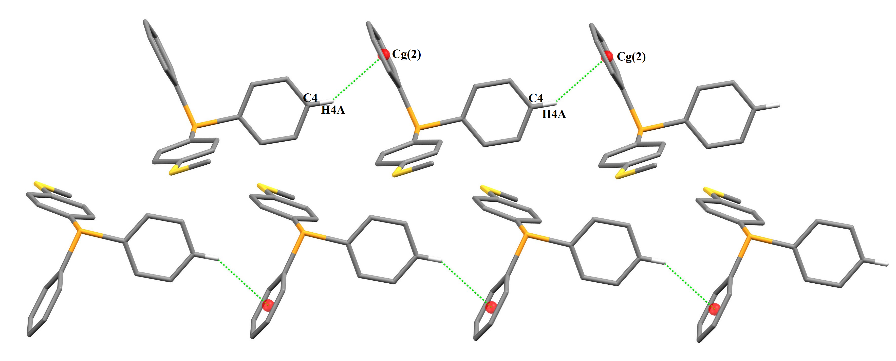


c

a

b

**Figure S 3**:Crystal packing of **2**: [C11–H11A···Cg(1) and C4–H4A···Cg(2)] shows head-to-head arrangement along *b*-direction.


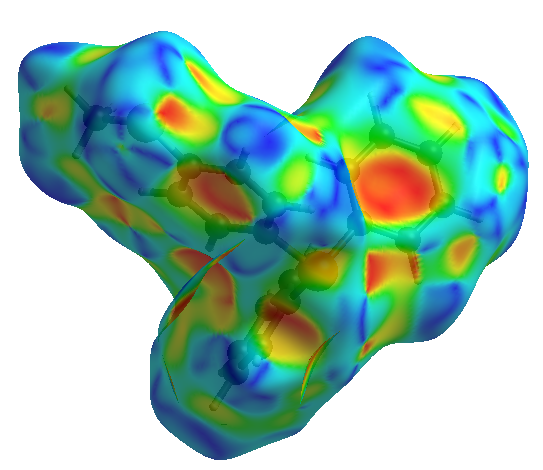

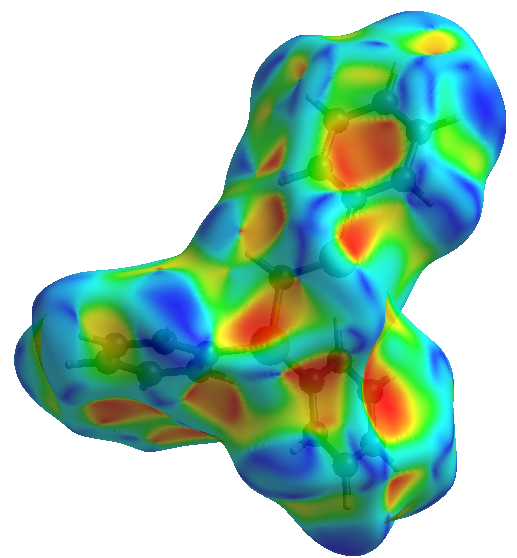


(**1**) (**2**)

**Figure S 4**: Hirshfeld surfaces **1** and **2** mapped over shape-index with a red spot (inside

the black arrows) signifying the involvement of the C–H···π interactions.
